# Supplementary material for: The in situ redispersion of a PdCu/AC alloy catalyst under a CFCl2CF2Cl/H2 atmosphere: a combination of experimental and DFT study
Source: Royal Society of Chemistry journal article supplement (doi:10.1039/d0cc03164j), 2020-01-01
Supplement: d0cc03164j1.pdf [file d0cc03164j1.pdf]

## Supplementary Information

### The *in-situ* redispersion of PdCu alloy catalyst under the $\text{CFCl}_2\text{CF}_2\text{Cl}$ atmosphere: a combination of experimental and DFT study

Haodong Tang<sup>1\*</sup>, MingMing Dang<sup>1</sup>, Feiran Zhang<sup>2</sup>, Bin Xu<sup>1</sup>, Lichun Li<sup>1</sup>, Weiyu Song<sup>2</sup>, Wenfeng Han<sup>3</sup>, Ying Li<sup>3</sup> and Zongjian Liu<sup>1\*</sup>

<sup>1</sup>College of Chemical Engineering, Zhejiang University of Technology, 18 Chaowang Road, Hangzhou 310014, PR China.

<sup>2</sup>State Key Laboratory of Heavy Oil Processing, China University of Petroleum (Beijing), Beijing, P.R. China

<sup>3</sup>Industrial Institute of Catalysis, Zhejiang University of Technology, Hangzhou 310032, PR China.

\*Corresponding author –Dr Haodong Tang, tanghd@zjut.edu.cn; Dr Zongjian Liu, zjliu@zjut.edu.cn

#### 1. Experimental

##### Chemicals

$\text{CFCl}_2\text{CF}_2\text{Cl}$  (99.5%) gas was obtained from Zhejiang Research Institute of Chemical Industry; Active carbon was purchased from Hang Zhou Wan Jing New Material Co., Ltd; AR grade HCl solution was obtained from Shanghai Hongguang Chemical Factory;  $\text{Cu}(\text{NO}_3)_2 \cdot 3\text{H}_2\text{O}$  (99.8%) was obtained from Shanghai Macklin Biochemical Technology Co., Ltd;  $\text{PdCl}_2$  (99.98%) was purchased from Sino-Platinum Metals Co., Ltd.  $\text{N}_2$ (99.999%),  $\text{H}_2$  (99.999%) were purchased from Hangzhou Minoxing Industry and Trade Gas Co., Ltd.

### 1 ***Preparation of Sintered Catalysts, metal/AC-S***

2 The active carbon supported PdCu bimetallic and monometallic (Pd, Cu)  
3 catalysts were prepared by impregnation method. The Pd content was sourced from a  
4 mixed 0.05 M HCl/PdCl<sub>2</sub> solution and Cu content sourced from 0.05 M Cu(NO<sub>3</sub>)<sub>2</sub>  
5 solution. Before the impregnation, available activated carbon was dried overnight at  
6 373 K. After that, the corresponding metal salt solutions were added onto the active  
7 carbon support and treated by ultrasonic for 20 minutes at 298 K. The mixture was  
8 then aged for 12 h at room temperature to ensure the successful impregnation. The  
9 resulting sample was subsequently dried overnight at 383K to remove the excess  
10 amount of water. The dried sample was then loaded to a fixed bed reactor and  
11 subjected to a reduction process. The sample was heated up to 575K (10 K/min) and  
12 flushed with H<sub>2</sub> (20 ml/min) for three hours. In order to simulate the deactivation of  
13 catalysts via thermodynamic sintering, the fresh catalysts were further calcined at 673  
14 K for 2 hours under pure N<sub>2</sub> flow of 40 mL/min. And then the catalysts were cooled to  
15 room temperature under the same atmosphere. The resulting catalysts were labelled as  
16 sintered catalysts, metal/AC-S. Same method was used to prepare the monometallic  
17 Pd/AC and Cu/AC catalysts.

### 18 ***Redispersing of sintered catalysts, metal/AC-R***

19 To perform the catalysts redispersion process, the sintered catalysts were treated  
20 with a mixture gas of 0.06 mL/min CFCl<sub>2</sub>CF<sub>2</sub>Cl and 20mL/min H<sub>2</sub> at 573 K for 30 h  
21 and then the catalystswere cooled at inert gas N<sub>2</sub> atmosphere (40 mL/min).The  
22 resulting catalysts were marked as redispersed catalysts, metal/AC-R.

### 23 ***Characterization***

24 The X-ray powder diffraction (XRD) characterization was recorded on a Rigaku  
25 instrument equipped with scintillation counter detector by using nickel-filtered CuK $\alpha$   
26 (0.15418 nm) radiation source over the range of  $30^{\circ} \leq \theta \leq 90^{\circ}$ . We have used

27 High resolution transmission electron microscopy (HRTEM) has been executed  
28 using a JOEL JEM-1200EX microscope with a field emission gun as source of  
29 electrons. The point-to-point resolution of the microscope was 0.20 nm operated at  
30 160 kV. Samples were deposited on Molybdenum (Mo) or Nickel (Ni) grid by placing  
31 a few droplets of a suspension of ground sample in ethanol on the grid, followed by  
32 drying at ambient conditions.

33 X-ray photoelectron spectroscopy (XPS) using an ESCALAB210 instrument  
34 (Physical Electronics) equipped with an Mg target K $\alpha$  X-ray radiation source ( $h\nu =$

1 1253.6 eV). The binding energy (BE) scale was calibrated using a C 1s peak at 284.60  
2 eV.

### 3 ***Computational details***

4 All calculations were performed with the density functional theory (DFT) as  
5 implemented in the Vienna Ab Initio Simulation Package <sup>1, 2</sup>. The projector augmented  
6 wave (PAW) method was used to describe the interactions between the ions and the  
7 electrons with frozen-core approximation <sup>3, 4</sup>. The Perdew-Burke-Ernzerhof (PBE)  
8 electron exchange-correlation functional was adopted as well <sup>5</sup>. PAW potentials acted  
9 on the self-consistently optimized 4d electrons of Pd, 3d/4s electrons of Cu, 3s/3p  
10 electrons of Cl, 2s/2p electrons of F, and 2s/2p electrons of C. Kinetic cut-off energy  
11 was set in 400 eV.  $\Gamma$ -point-centered Monkhorst-Pack k-point meshes of  $3 \times 3 \times 1$  were  
12 used for the Brillouin zone integration. The stable point was identified by the  
13 conjugate gradient method until the forces acting on each ion were smaller than 0.05  
14 eV/Å. The energy criterion for convergence of the electron density was set at  $10^{-4}$  eV.  
15 Transition state was calculated by climbing image nudged elastic band method  
16 (CINEB) <sup>6</sup>.

17 The bulk equilibrium lattice constants of Cu are  $a = b = c = 3.614 \text{ Å}$  and  $\alpha = \beta = \gamma =$   
18  $90^\circ$ . Because Pd is evenly dispersed on the surface of Cu, PdCu<sub>3</sub> model was built by  
19 replacing one Cu atom with one Pd atom on the primitive cell of Pd to to keep the  
20 ratio of Pd:Cu to be 1: 3. Next the 111 surface was cleaved based on the PdCu<sub>3</sub> alloy  
21 model. Then (2×2) supercell for the PdCu<sub>3</sub> surface was built. Different Pd(111) has  
22 been investigated in previous study <sup>7</sup>. The adsorption and dissociation of CCIF<sub>2</sub>-CCl<sub>2</sub>F  
23 was investigated on the most stable (111) surface of Pd and Cu<sub>3</sub>Pd. The two top  
24 atomic layers of the (111) surface of Pd and Cu<sub>3</sub>Pd were allowed to relax and the rest  
25 of two atomic layers were fixed. The vacuum gap thickness was set to 15 Å. The  
26 adsorption energy is defined as following:

$$27 \quad E_{\text{ads}} = E_{\text{adsorbate+surface}} - E_{\text{adsorbate}} - E_{\text{surface}} \quad (1)$$

28 in which,  $E_{\text{adsorbate+surface}}$  is the total energy of the adsorbate interacting with the  
29 slab, and  $E(\text{adsorbate})$  and  $E(\text{substrate})$  are the energies of free adsorbate in gas phase  
30 and bare surface, respectively. Therefore, a negative value corresponds to an  
31 exothermic adsorption, and a more negative value shows a stronger adsorption.

32

## 33 **2. CO oxidation reaction**

Carbon monoxide oxidation was chosen as probe reaction to examine the catalytic performance of sintered and redispersed catalysts. About 0.5 g of the catalyst was placed in the tubular flow reactor where the mixed gas flow containing reactant  $O_2$  (20 mL/min), CO (10 mL/min) and  $N_2$  (170 mL/min) passing through. The reaction was performed at 120 °C under atmosphere condition. The composition of the gas phase was determined by a gas chromatography (GC9560) equipped with TCD analyser. The catalytic activity of the three different forms of the bimetallic PdCu/AC catalysts, including the fresh, sintered and redispersed forms are shown in Figure S2. Under same reaction conditions, the CO conversion is 65.8% over the fresh PdCu/AC catalyst. After calcination of the catalyst under  $N_2$  at 673 K, the CO conversion rate over PdCu/AC-S catalyst drops dramatically to ~17%. After the R-113/ $H_2$  gas treatment, the CO conversion rate restored to same level as the fresh catalyst. This proves that the redispersion of Pd to small particles can recover the catalytic performance to the same level as that of the fresh catalyst.

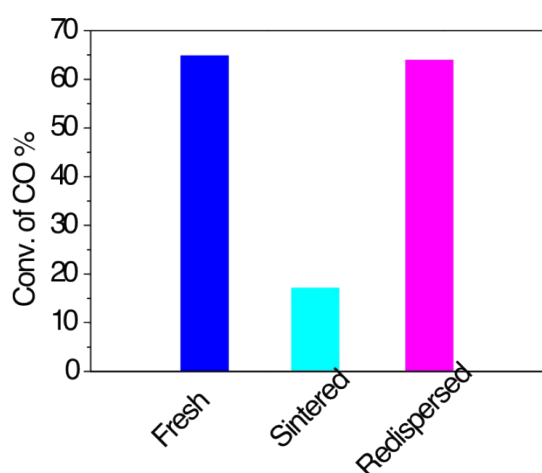

**Figure S1. Conversion rate of CO oxidation over 3 bimetallic PdCu/AC catalysts including PdCu/AC-F (Fresh), PdCu/AC-S (sintered), PdCu/AC-R (redispersed)**

### 3. Redispersion of Cu/AC catalyst

The same R113/ $H_2$  gas treatment was applied for monometallic Cu/AC-S catalyst as well to explore the effectiveness of the dispersion process on monometallic Cu/AC-S catalyst. The XRD patterns of the sintered and redispersed Cu/AC catalysts are shown in Figure S2.

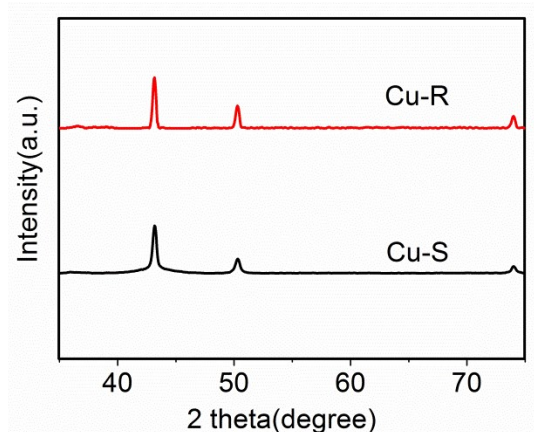

**Figure S2. XRD patterns of the Cu/AC-S and Cu/AC-R catalyst**

As can be seen from Figure S1, there are no obvious changes can be observed between the XRD patterns of the sintered and redispersed Cu/AC catalysts, indicating no noticeable redispersion of the Cu/AC-R catalyst. This was also confirmed with the estimated Cu crystal size with 21.4 nm and 26.2 nm before and after the R113/H<sub>2</sub> gas treatment. According to the standard reducing potential of Cu (0.3419 eV) and Pd(0.951 eV), Cu is more active and supposed to go through the interaction with R-113 and form oxidized Cu species (Cu<sup>2+</sup>) on the surface of the alloyed catalysts. However, due to the low sintering/Tammann temperature (678 °C), the aggregation process totally dominates and suppresses the redispersion process of the single Cu metal.

#### 4. Two-step redispersion process

A two-step redispersion process, namely firstly treated by R113 and then reduced by H<sub>2</sub>, was also tested for the redispersion of the sintered PdCu/AC catalyst. The sintered catalyst was firstly treated with R113 at 300 °C for 5 hours and then reduced by H<sub>2</sub> for 2 hours at the same temperature. The TEM images of the redispersed PdCu/AC-R' are shown in Figure S3. According to Figure S3, the crystal size of the PdCu/AC-R' catalyst reduced to about 11 nm after the step by step oxidation-reduction process. This confirm that treat with R113 at evaluated temperatures, the formation of oxidative intermediates occurs and initiates the redispersion process.

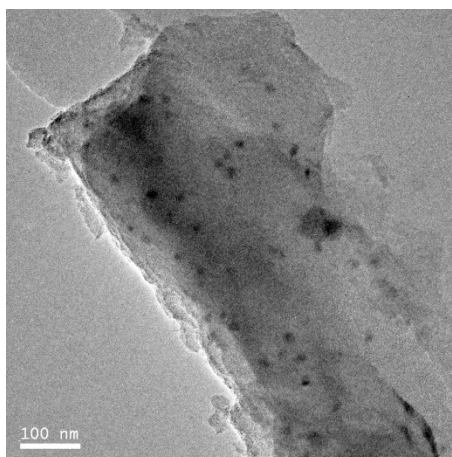

**Figure S3. TEM image of the PdCu/AC-R' catalyst**

## 5. XPS Spectra

The Cl 2p XPS spectra of the PdCu/AC catalyst before and after the R113/H<sub>2</sub> gas treatment was presented in Figure S4. The peak at binding energy of 197.8 and 200.7 eV were assigned to Pd-Cl and Cu-Cl bond while the peak at binding energy of 200.2 eV was assigned to the present of organic chlorine on the surface of the catalyst. It is clear that the content of Pd-Cl bond increases significantly after the R113/H<sub>2</sub> gas treatment, indicating the presence of PdCuCl<sub>x</sub> intermediate on the surface of the PdCu/AC catalyst.

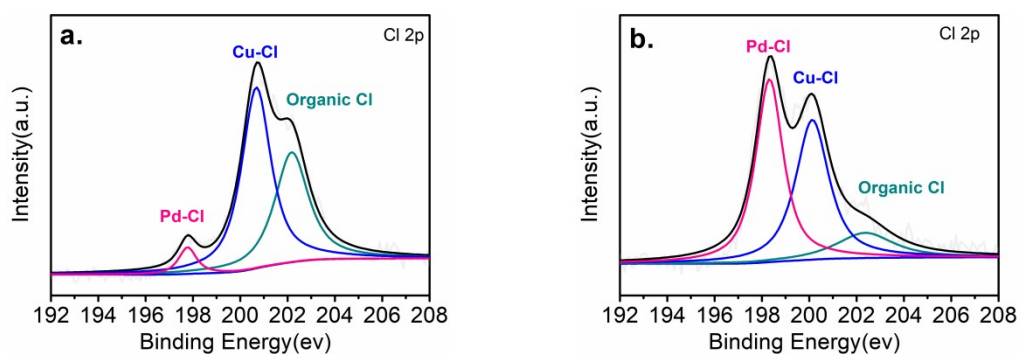

**Figure S4. The XPS spectra of Cl 2p region obtained for catalysts of PdCu/AC-S (a) and PdCu/AC-R (b).**

## References

1. Kresse G, Hafner J, *Phys. Rev. B: Condens. Matter*, 1994, **49**, 14251-14269.
2. G. Kresse, J. Hafner, *Phys. Rev. B*, 1993, **47**, 558-561.
3. P. E. Blöchl, *Phys. Rev. B*, 1994, **50**, 17953-17979.
4. G. Kresse, Joubert D, *Phys. Rev. B*, 1999, **59**, 1758-1775.
5. J. P. Perdew, *Phys. Rev. Lett.*, 1996, **77**, 3865.
6. Z. Duan, G. Henkelman, *ACS Catal.*, 2014, **4**, 3435-3443.

- 1 7. X. Nie, X. Jiang, H. Wang, W. Luo, M. J. Janik, Y. Chen, X. Guo and C. Song,  
2 *ACS Catal.*, 2018, **8**, 4873-4892.  
3
